# Supplementary material
Source: PubMed Central journal article supplement (PMC3437384)
Supplement: NIHMS380034-supplement-1_si_001.pdf [file NIHMS380034-supplement-1_si_001.pdf]

## SUPPORTING INFORMATION

- (1) MD movies made from the simulation trajectories:
  - cNTnC•Ca<sup>2+</sup>•cTnI<sub>147-163</sub> structure simulations WT vs. L48Q
  - Apo cNTnC structure simulations WT vs. L48Q
  - cNTnC•Ca<sup>2+</sup> structure simulations WT vs. L48Q

- (2) Figures

Figure 1 The stabilizing role of L48. A. Cartoon representation of cNTnC•Ca<sup>2+</sup> (PDB: 1AP4) is shown with helices labeled and the side chains of L48, F20, A23, and F27 are colored in orange. B. -90° rotation about the y-axis of A.

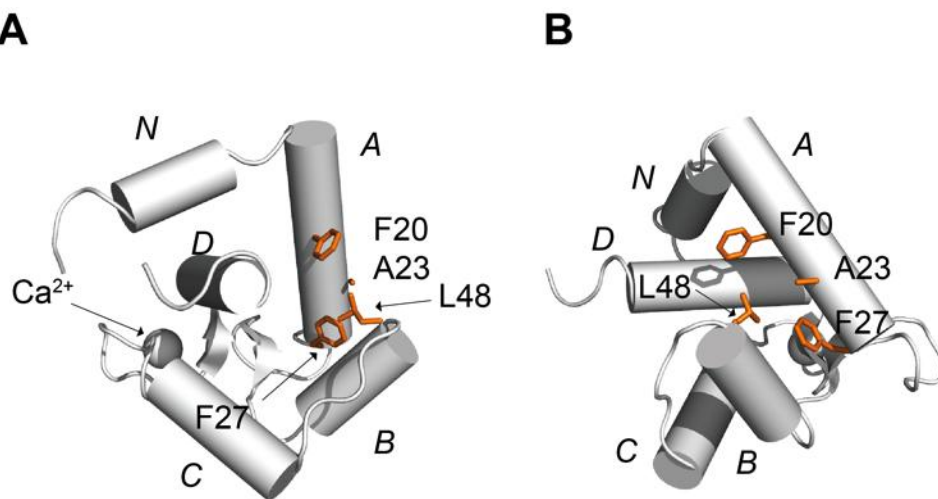

Figure 2. Plots of  $^{15}\text{N}$ - $T_2$ ,  $^{15}\text{N}$ - $T_1$ , and  $\{^1\text{H}\}^{15}\text{N}$  NOE (500 MHz and 600 MHz relaxation data are superimposed) for 0.33 mM cNTnC(L48Q)• $\text{Ca}^{2+}$ .  $T_1$  and  $T_2$  increase with an increase internal motion, and NOE decreases with an increase in internal motion. Residues 87-89, at the C-terminus of cNTnC(L48Q) have high  $T_1$  and  $T_2$  and low NOE, which indicate that the C-terminus of cNTnC(L48Q) is disordered.

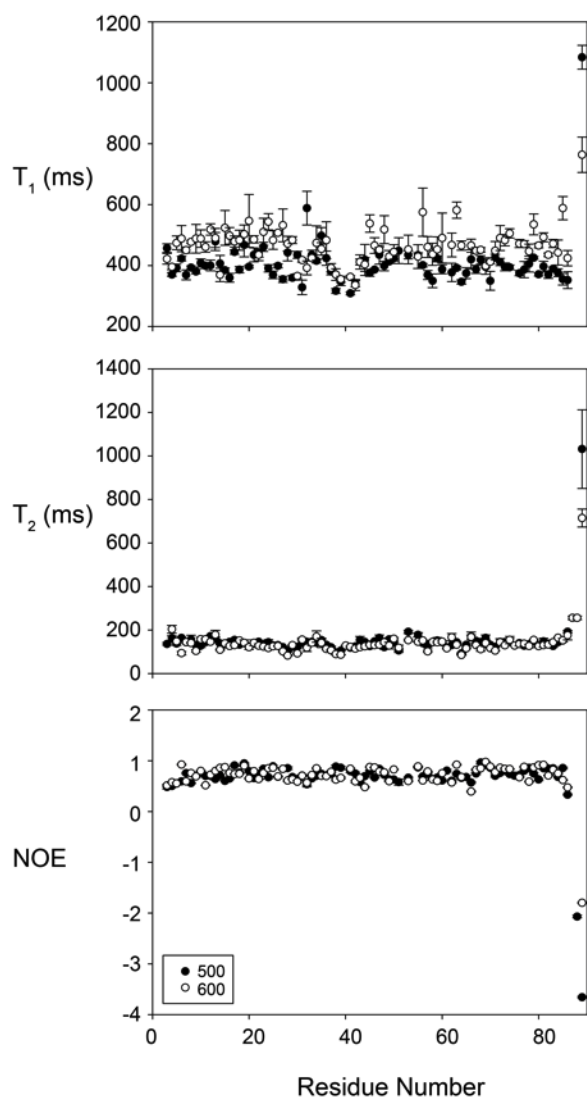

Figure 3. A. Plots of  $^{15}\text{N}$ - $T_2$ ,  $^{15}\text{N}$ - $T_1$ , and  $\{^1\text{H}\}^{15}\text{N}$  NOE of  $\text{cNTnC}\cdot\text{Ca}^{2+}$  superimposed with  $\text{cNTnC(L48Q)}\cdot\text{Ca}^{2+}$ . The concentrations of  $\text{cNTnC(wt)}\cdot\text{Ca}^{2+}$  and  $\text{cNTnC(L48Q)}\cdot\text{Ca}^{2+}$  were both 0.15 mM in order to limit the influence any aggregation may have on the relaxation data. B. Differences in  $T_1$ ,  $T_2$ , and NOE data between  $\text{cNTnC(L48Q)}\cdot\text{Ca}^{2+}$  and  $\text{cNTnC}\cdot\text{Ca}^{2+}$  are plotted. Overall, the data are consistent; however, there are deviations between the two proteins in residues of site I (residues 29-40; highlighted in dashed box), which may represent a change in conformation and/or dynamics of this site.

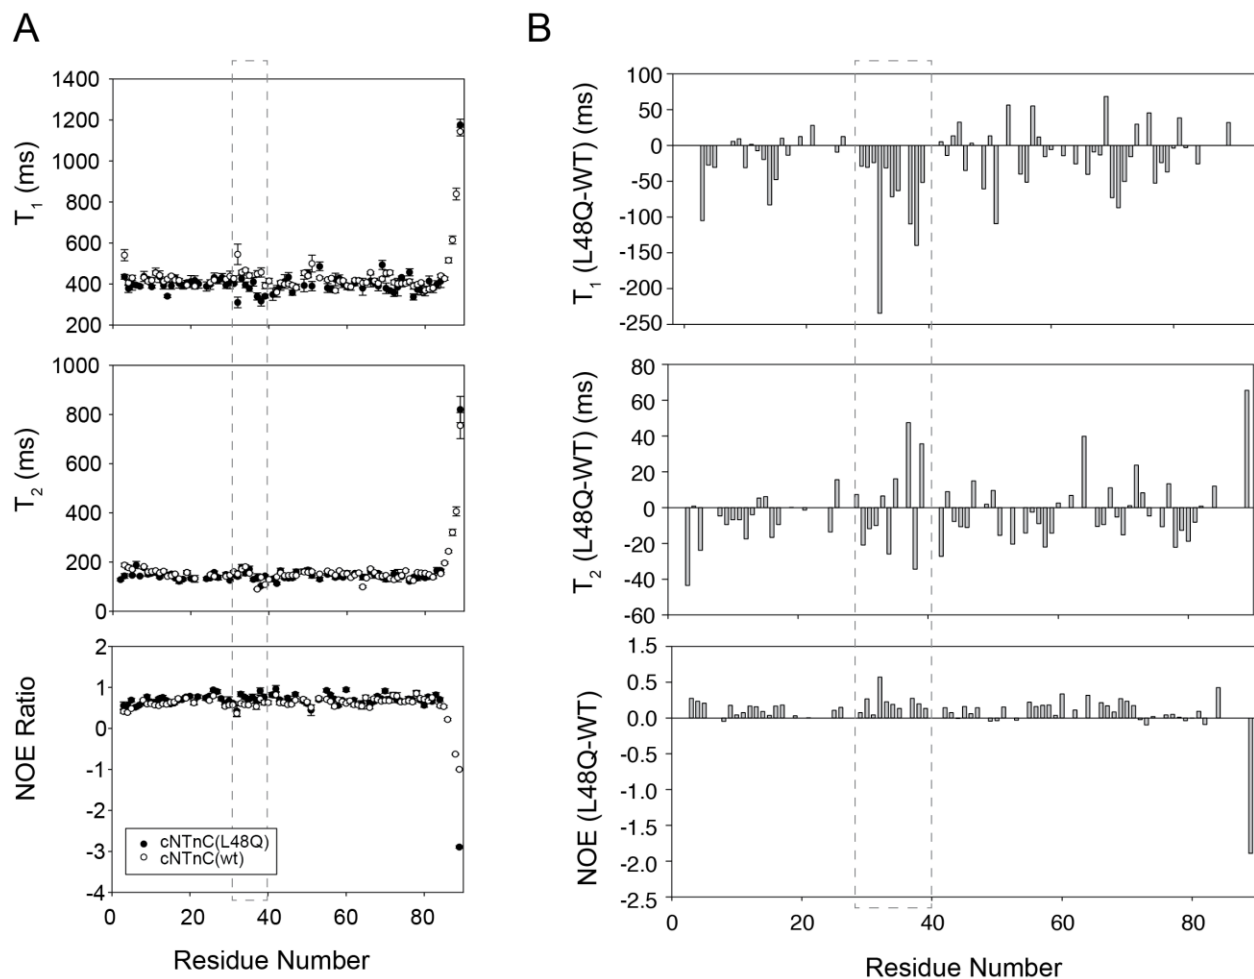

Figure 4. Residue N50 and M80 in cNTnC indicating the opening of the cNTnC

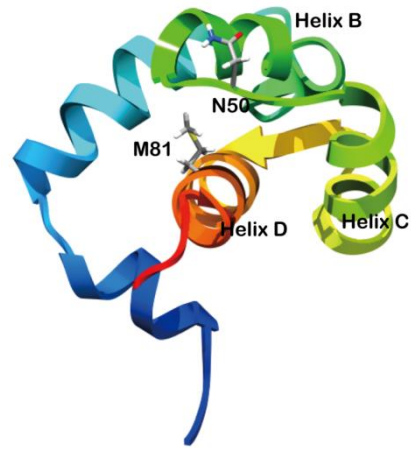

(3)Tables:

Table 1. Distances between residue M81 and N50 in cNTnC .

|                                                    |                       |                 | WT                       | L48Q                     |
|----------------------------------------------------|-----------------------|-----------------|--------------------------|--------------------------|
| Protein                                            | Original NMR PDB code | Original NMR(Å) | 70ns MD Simulations* (Å) | 70ns MD Simulations* (Å) |
| cNTnC•Ca <sup>2+</sup><br>•cTnI <sub>147-163</sub> | 1MXL                  | 17.5            | 16.11±1.5                | 17.97±1.3                |
| cNTnC apo                                          | 1SPY                  | 8               | 9.81±1.3                 | 11.66±1.9                |
| cNTnC•Ca <sup>2+</sup>                             | 1AP4                  | 10              | 10.66±1.3                | 13.54±1.9                |

\*Averaged from multiple runs of simulations (0-70ns).

Table 2 Total (main-chain and side-chain) SASA of the selected hydrophobic patch residues in cNTnC\*

|                                                 | WT (Å <sup>2</sup> ) | L48Q (Å <sup>2</sup> ) |
|-------------------------------------------------|----------------------|------------------------|
| Apo cNTnC                                       | 611±39               | 685±38                 |
| cNTnC.Ca <sup>2+</sup>                          | 630±43               | 642±39                 |
| cNTnC•Ca <sup>2+</sup> •cTnI <sub>147-163</sub> | 722±42               | 748±39                 |

\*Averaged from multiple (n ≥3) simulations at last 45-70ns.
